# Supplementary material for: Tinnitus Assessment : Chinese Version of Tinnitus Primary Function Questionnaire
Source: Research Square preprint supplement (doi:10.21203/rs.3.rs-146043/v1), 2021-01-19
Supplement: Supplementary file 1 [file 366208d2689010a136ae9b30.docx]

Appendix 3.The Chinese version of Tinnitus Primary Function Questionnaire (12-Item Version)

说明:请根据每个问题的严重程度填写您的评分（0到100间的任何数字）。0表示表示您极不赞同，100表示您极赞同。

|  | 注意力 | 原条目 |
| --- | --- | --- |
| 1 | 我感觉耳鸣使我难于集中精力做一些工作。 | 7 |
| 2 | 因为耳鸣，我不能集中精力做一些重要的事情。 | 11 |
| 3 | 耳鸣最严重的影响是我不能够不受干扰地思考一些问题。 | 15 |
|  | 情绪 |  |
| 4 | 我情绪的稳定是耳鸣影响最大的一方面。 | 4 |
| 5 | 因为耳鸣我情绪低落。 | 8 |
| 6 | 因为耳鸣，我很焦虑。 | 10 |
|  | 听力 |  |
| 7 | 耳鸣影响我听语言 | 2 |
| 8 | 除了耳聋以外，耳鸣也影响我对语言的理解。 | 14 |
| 9 | 耳鸣最严重的影响是干扰我对语言的理解，这超过了听力下降对语言理解的影响。 | 17 |
|  | 睡眠 |  |
| 10 | 耳鸣影响我睡觉使我整天疲惫。 | 16 |
| 11 | 因为耳鸣，我整夜不能入睡。 | 18 |
| 12 | 当我晚上醒来，耳鸣是我不能再入睡。 | 20 |
